# Supplementary material for: Acute stress does not affect risky monetary decision-making
Source: PubMed Central journal article supplement (PMC5145911; doi:10.1016/j.ynstr.2016.10.003), 2016-11-02

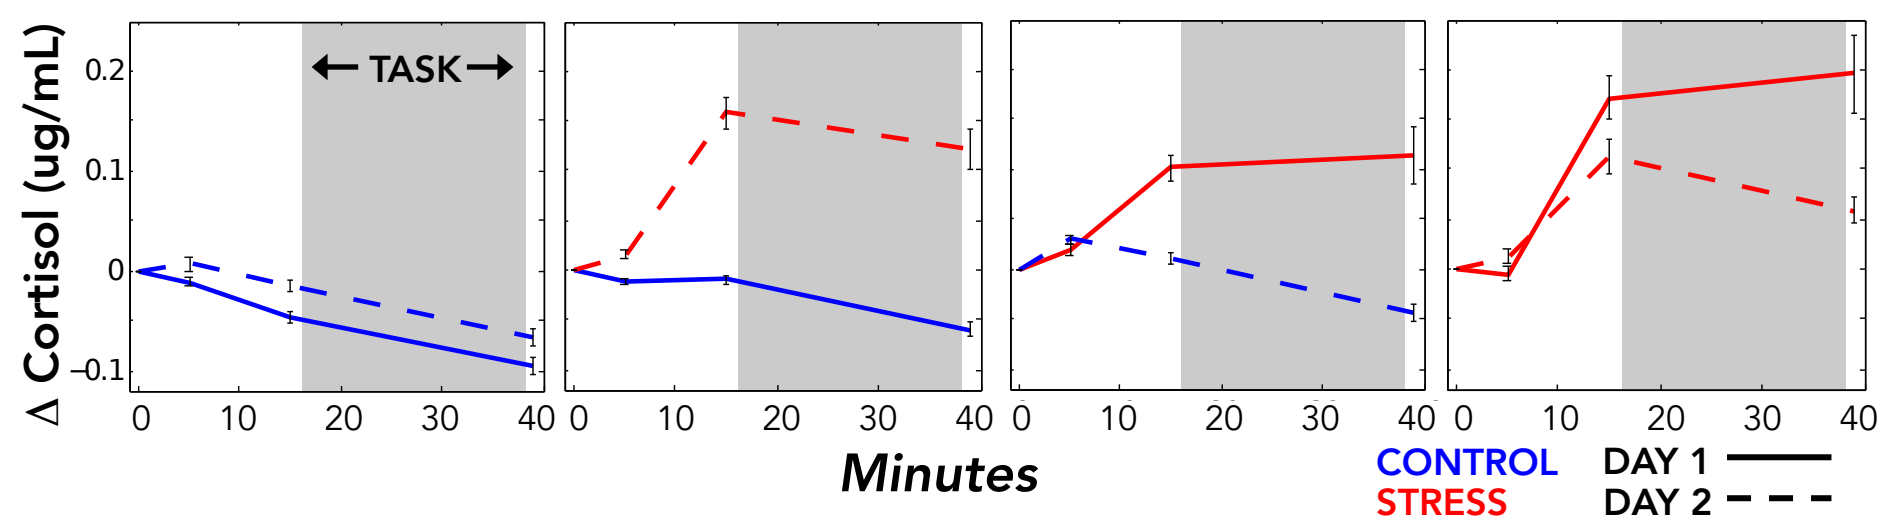

Supplement: mmc1.pdf [file mmc1.pdf]
