# Supplementary material for: Acute stress does not affect risky monetary decision-making
Source: PubMed Central journal article supplement (PMC5145911; doi:10.1016/j.ynstr.2016.10.003), 2016-11-02
Supplement: mmc3.pdf [file mmc3.pdf]

Change due to **Cortisol**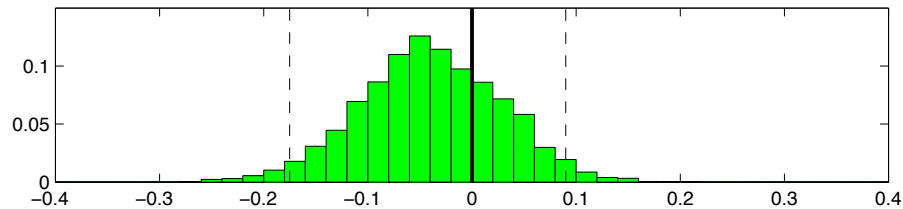Change due to **Day**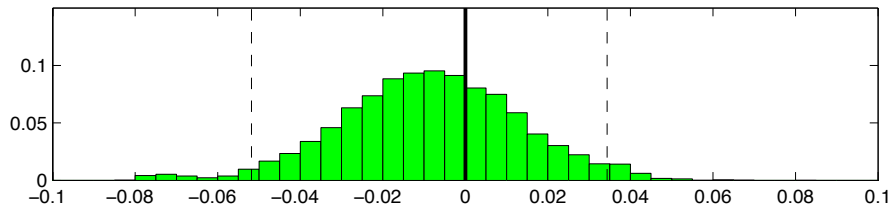Change in Risk Attitudes ( $\rho$ )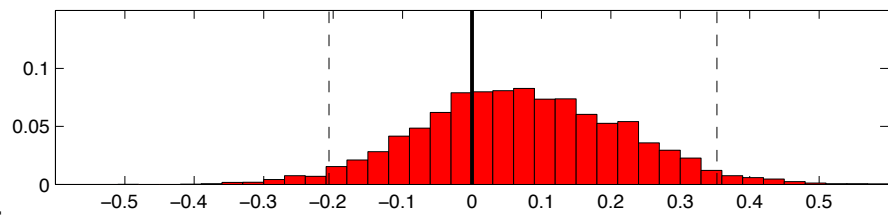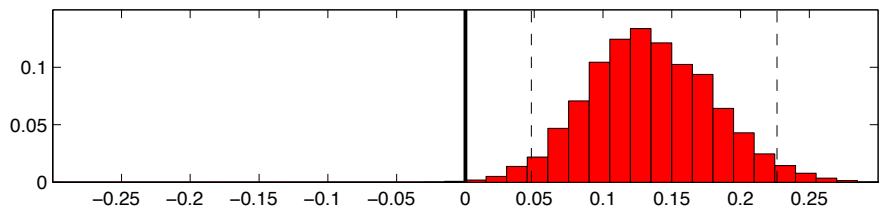Change in Loss Aversion ( $\lambda$ )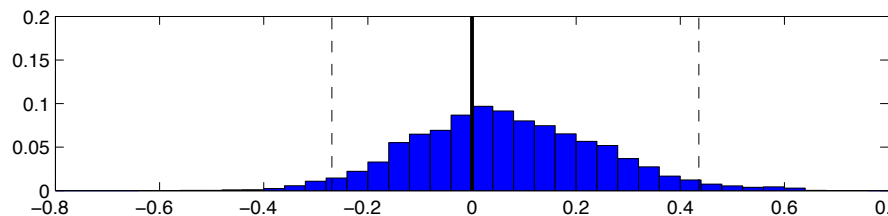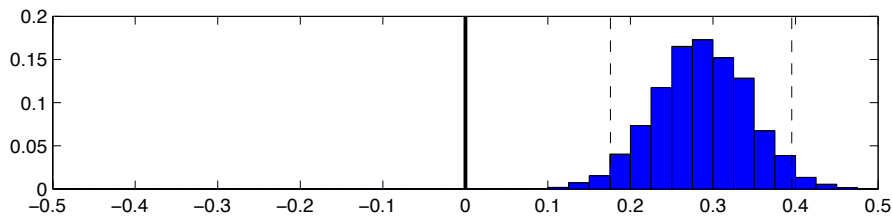Change in Consistency ( $\mu$ )

p(true value)
