# Supplementary material for: Acute stress does not affect risky monetary decision-making
Source: PubMed Central journal article supplement (PMC5145911; doi:10.1016/j.ynstr.2016.10.003), 2016-11-02
Supplement: mmc4.pdf [file mmc4.pdf]

| 1 <sup>st</sup> Author   | Year | Journal                              | Stressor              | Task                                           | Risk Measure                  | Other decision measures                        | Btwn/<br>Within? | N   | Pwr  | Rough finding                                                                                     | M/F? | G/L? | Notes                                                                                      | Implied Effect on p |
|--------------------------|------|--------------------------------------|-----------------------|------------------------------------------------|-------------------------------|------------------------------------------------|------------------|-----|------|---------------------------------------------------------------------------------------------------|------|------|--------------------------------------------------------------------------------------------|---------------------|
| Preston et al            | 2007 | Behavioral Neuroscience              | TSST                  | IGT                                            | IGT performance               | N.A.                                           | B                | 40  | 0.15 | Stress slows down learning, men ultimately do poorly, women do fine.                              | YES  |      | N.A.                                                                                       | Larger              |
| Starcke et al            | 2008 | Behavioral neuroscience              | ~TSST                 | GDT                                            | GDT net score                 | N.A.                                           | B                | 40  | 0.15 | Lower GDT score.                                                                                  | NO   |      | No gender effect                                                                           | Larger              |
| Pabst et al              | 2013 | Behavioral neuroscience              | TSST                  | GDT                                            | GDT net score                 | N.A.                                           | B                | 126 | 0.39 | Lower GDT score.                                                                                  |      |      | Large subject pool                                                                         | Larger              |
| Putman et al             | 2010 | Psychopharmacology                   | Cortisol admin        | Rogers gambles                                 | P(gamble)                     | N.A.                                           | W                | 29  | 0.34 | Gambled more when p(lose) was high.                                                               |      |      | N.A.                                                                                       | Larger (sort of)    |
| Pabst et al              | 2013 | Frontiers in behavioral neuroscience | TSST                  | GDT (gain only/loss only)                      | GDT net score                 | N.A.                                           | B                | 80  | 0.26 | Fewer risky choices in the loss domain; no effect in the gain domain.                             | NO   | X    | GDT EVs better matched.                                                                    | Larger for losses   |
| Buckert et al            | 2014 | Frontiers in Neuroscience            | ~TSST                 | Gamble/guaranteed lotteries                    | P(gamble)                     | Ambiguity, working memory                      | B                | 75  | 0.21 | More risk seeking for gains, only in cortisol responders (N = 26).                                | NO   | X    | 55 stress, 20 control; variable probabilities                                              | Larger for gains    |
| Van Den Bos et al        | 2009 | Psychoneuroendocrinology             | TSST                  | IGT                                            | IGT performance               | N.A.                                           | B                | 33  | 0.14 | Males worse, females better if mild, worse if strong cort.                                        | YES  |      | N.A.                                                                                       | Larger & Smaller    |
| Lighthall et al          | 2009 | PLoS One                             | CPT                   | BART                                           | # balloon pumps               | N.A.                                           | B                | 45  | 0.17 | Men pump more, women pump less.                                                                   | YES  |      | N.A.                                                                                       | Larger & Smaller    |
| Pabst et al              | 2013 | Behavioral brain research            | TSST                  | GDT                                            | GDT net score                 | N.A.                                           | B                | 40  | 0.15 | More risk averse 5&18min after, less risk averse 28min after.                                     |      |      | All males; 10 subj/4 groups                                                                | Larger & Smaller    |
| Von Helversen & Rieskamp | 2013 | Conf. Proceedings                    | CPT                   | Two gamble task                                | P(gamble)                     | N.A.                                           | B                | 69  | 0.24 | More risk with low outcome, less risk with high outcome gambles.                                  | NO   |      | No gender fx w stress                                                                      | Larger & Smaller    |
| Robinson et al           | 2014 | PeerJ                                | Threat of shock       | IGT                                            | IGT performance               | N.A.                                           | W                | 47  | 0.52 | Low anx/dep, more risk averse; high anx/dep, more risk seeking.                                   |      |      | Interaction w/ trait anx & BDI scores                                                      | Larger & Smaller    |
| Porcelli & Delgado       | 2009 | Psychological Science                | CPT                   | Two gamble task                                | P(gamble)                     | N.A.                                           | W                | 27  | 0.32 | More risky in losses, less risky in gains.                                                        |      | X    | Single valence trial types                                                                 | Smaller             |
| Cingl & Cahlikova        | 2013 | Discussion paper                     | TSST                  | Gain-only simple lottery questionnaire         | Change point                  | N.A.                                           | B                | 78  | 0.26 | Lower certainty equiv.                                                                            |      |      | Dropped inconsistent subj; men are p = 0.1, women are p = 0.14; correlation w/ cort is sig | Smaller             |
| von Dawans et al         | 2012 | Psychological science                | TSST                  | Two gamble task                                | P(gamble)                     | N.A.                                           | B                | 67  | 0.23 | No change in risk aversion.                                                                       |      |      | Also had sharing game, punishment game, trust game                                         | No change           |
| Lempert et al            | 2012 | Frontiers in Psychology              | ~TSST                 | Gain-only lotteries                            | AUC of prob. discounting rate | Temporal discounting                           | B                | 113 | 0.36 | No effect of stress on gambling; interaction btwn chronic & acute stress on temporal discounting. |      |      | All males; variable probabilities; staircasing procedure                                   | No change           |
| Delaney et al            | 2014 | Discussion paper                     | CPT                   | Holt and Laury scale                           | Change point                  | Temporal discounting and probability weighting | W                | 90  | 0.80 | No change in risk aversion                                                                        |      |      | N.A.                                                                                       | No change           |
| Kandasamy et al          | 2014 | PNAS                                 | Cortisol admin        | Two gamble task                                | Curvature                     | Probability weighting                          | W                | 36  | 0.42 | More risk averse with chronic cort (and no fx with acute cort).                                   | NO   |      | No gender fx; lotteries are complex                                                        | No change           |
| Chumbley et al           | 2014 | Psychological science                | N.A. (Tonic cortisol) | DOSE (based on Sokol-Hessner et al, 2009 task) | Curvature                     | Loss aversion                                  | W                | 53  | 0.57 | No relationship of cort to rho; neg corr w/ Lambda.                                               |      |      | Only fx w/ chronic!                                                                        | No change           |
| Sokol-Hessner et al      |      |                                      | CPT                   | Sokol-Hessner et al, 2009 task                 | Curvature                     | Loss aversion, consistency                     | W                | 120 | 0.90 | No effect of acute stress on risk att, loss aversion, or consistency.                             | NO   |      | N.A.                                                                                       | No change           |
